# Supplementary material
Source: MDPI journal article supplement (https://www.mdpi.com/2072-4292/13/2/321)
Supplement: s1 [file s1]

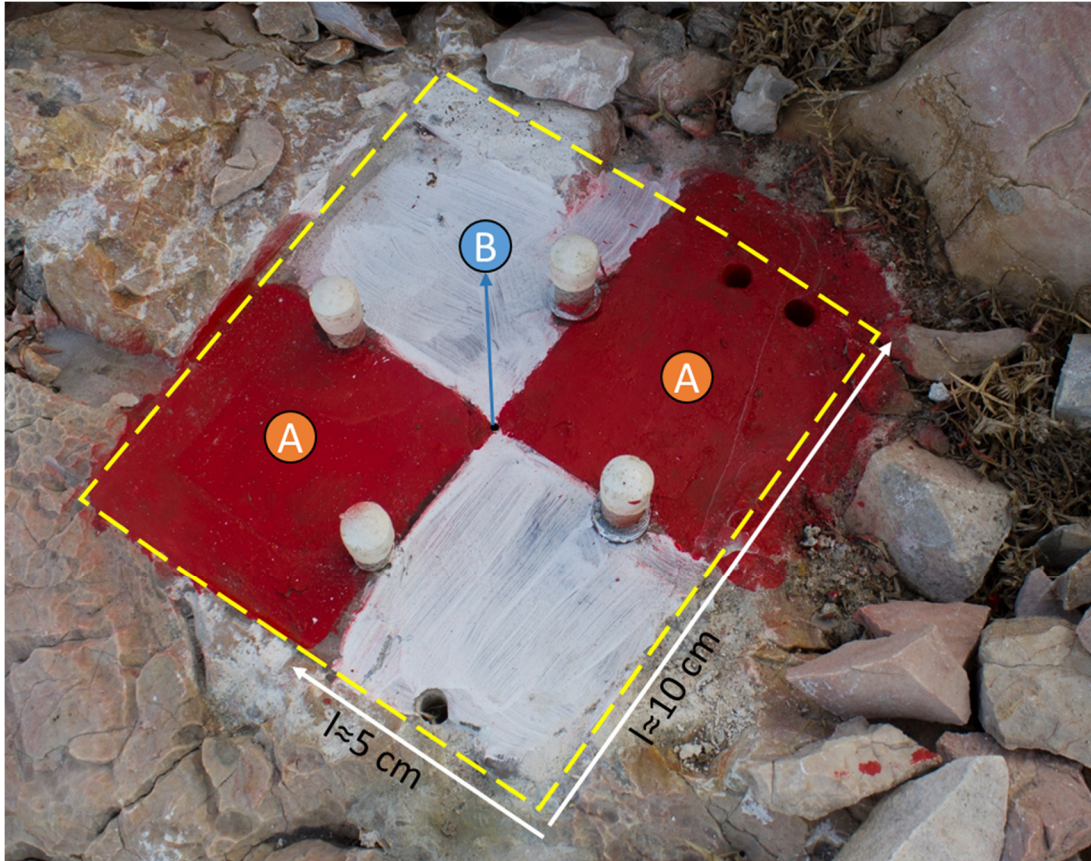

**Scheme 1.** Permanent GCP for repeat UAV photogrammetric surveys<sup>1 2</sup>.

(A – square markings (25 cm<sup>2</sup>) marked with red spray on pedestal cut in limestone bedrock;

B – a hole for RTK-GPS rover drilled at intersection of two red square markings)

<sup>1</sup> Four steel anchor bolts protected with white plastic caps (seen in the picture) are used for mounting and fixing of spheres for interval surveys with Faro Focus M70 terrestrial laser scanner, which is part of other research, and as such it is not relevant for this manuscript.

<sup>2</sup> Initially red crosses were used for markation of GCPs and CPs, which were later substituted with red and white squares.
